# Supplementary material for: Total and Free Sugars Consumption in a Slovenian Population Representative Sample
Source: Nutrients. 2020 Jun 9;12(6):1729. doi: 10.3390/nu12061729 (PMC7352580; doi:10.3390/nu12061729)
Supplement: Supplementary file 1 [file nutrients-12-01729-s001.xlsx]

## Sheet: Supplementary Table 1
Zupanič et al. 2020. Total and Free Sugars Consumption in a Slovenian Population Representative Sample
Table S1: Unweighted adjusted and unadjusted mean (95% CI) levels of free sugars (% TEI) intake by sex, place of living, BMI, IPAQ score, education, income, and employment for different age groups
Variable		Adolescents (10-17 years old)			Adults (18-64 years old)			Elderly (65-74 years old)
		n (%)	Unadjusted	Adjusted	n	Unadjusted	Adjusted	n	Unadjusted	Adjusted
Overall		468(37.5)	10.3(9.8-10.8)		364(29.2)	6.6(6.1-7.1)		416(33.3)	6.2(5.7-6.6)
Gender
	Male	238(50.9)	8.9(8.3-9.4)	8.9(8.2-9.5)	173(47.5)	5.8(5.1-6.4)	5.7(4.9-6.4)	213(51.2)	5.3(4.7-5.9)	5.2(4.6-5.9)
	Female	230(49.1)	11.8(11.1-12.5)	11.8(11.1-12.4)	191(52.5)	7.4(6.8-8.0)	7.3(6.6-8.0)	203(48.8)	7.0(6.4-7.7)	7.0(6.4-7.7)
Place of living
	Village	270(57.7)	10.5(9.8-11.1)	10.5(9.9-11.1)	202(55.5)	6.6(6.0-7.2)	6.4(5.7-7.1)	229(55.1)	6.0(5.4-6.6)	6.0(5.3-6.6)
	Town	76(16.2)	10.2(9.1-11.4)	10.1(9.0-11.2)	56(15.4)	6.4(5.1-7.7)	5.9(4.7-7.3)	71(17.1)	6.5(5.4-7.6)	6.4(5.3-7.5)
	City	122(26.1)	10(9.1-10.9)	10.1(9.2-11.0)	106(29.1)	6.8(5.9-7.7)	6.9(6.0-7.8)	116(27.9)	6.3(5.4-7.1)	6.2(5.3-7.1)
Education
	No university degree	n.a.	n.a.	n.a.	249(68.4)	6.8(6.2-7.4)	7.0(6.3-7.6)	342(82.2)	6.3(5.8-6.8)	6.2(5.7-6.8)
	University degree				115(31.6)	6.2(5.5-6.9)	5.6(4.6-6.5)	74(17.8)	5.4(4.5-6.3)	5.6(4.4-6.7)
Household net income
	Below averag (≤1300 €/month)	n.a.	n.a.	n.a.	118(38.4)	5.9(5.2-6.7)	5.8(4.9-6.6)	269(71.5)	6.3(5.8-6.8)	6.2(5.7-6.8)
	Above average (>1300 €/month)				189(61.6)	6.9(6.2-7.6)	7.0(6.3-7.7)	107(28.5)	5.6(4.8-6.5)	5.8(4.8-6.7)
BMI
	Normal	301(64.3)	10.5(9.9-11.1)	10.4(9.8-11.0)	148(40.7)	7.1(6.2-7.9)	6.8(6.0-7.7)	108(26.0)	5.9(5.2-6.6)	5.7(4.8-6.6)
	Overweight and obese	167(35.7)	10.0(9.2-10.8)	10.1(9.0-11.3)	216(59.3)	6.3(5.8-6.9)	6.3(5.8-6.9)	308(74.0)	6.2(5.7-6.8)	6.3(5.7-6.8)
IPAQ
	Low intensity	108(23.3)	10.0(9.0-10.9)	10.1(9.2-11.1)	127(35.3)	6.3(5.6-7.1)	6.4(5.5-7.3)	137(33.4)	6.3(5.5-7.1)	6.2(5.4-7.0)
	Moderate	141(30.5)	10.9(10.0-11.8)	10.6(9.8-11.5)	108(30.0)	6.6(5.8-7.4)	6.4(5.5-7.3)	133(32.4)	6.1(5.4-6.9)	5.9(5.1-6.7)
	High intensity	214(46.2)	10.1(9.4-10.8)	10.2(9.5-10.9)	125(34.7)	6.9(6.0-7.8)	6.7(5.9-7.6)	140(34.2)	6.1(5.3-6.9)	6.3(5.5-7.1)
Employment
	Employed	n.a.	n.a.	n.a.	226(62.1)	6.7(6.1-7.3)	6.5(5.9-7.2)	n.a.	n.a.	n.a.
	Unemployed				42(11.5)	6.8(5.2-8.3)	7.6(6.0-9.1)
	Student				32(8.8)	7.4(6.2-8.6)	6.6(4.6-8.6)
	Retired				64(17.6)	5.9(4.9-7.0)	5.7(4.4-7.0)

## Sheet: Supplementary Table 2
Table S2: Mean contribution (%) to the total and free sugars intake per food groups (all)
Dunford category	Dunford subcategory	Adolescents						Adults						Elderly
		All		Males		Females		All		Males		Females		All		Males		Females
		Total sugars (%)	Free sugars (%)	Total sugars (%)	Free sugars (%)	Total sugars (%)	Free sugars (%)	Total sugars (%)	Free sugars (%)	Total sugars (%)	Free sugars (%)	Total sugars (%)	Free sugars (%)	Total sugars (%)	Free sugars (%)	Total sugars (%)	Free sugars (%)	Total sugars (%)	Free sugars (%)
Beverages		10.0683	15.6277	10.7098	16.2393	9.20444	14.7322	12.5678	21.5082	14.7704	23.4312	10.0776	18.6827	7.54776	11.7335	9.53288	14.1078	6.12901	9.72692
	Alcoholic beverages	0.167726	0.215598	0.232245	0.313395	0.0808388	0.0723953	0.875722	1.39552	1.07911	1.76675	0.645792	0.850055	0.821868	1.37832	1.55964	2.45703	0.294596	0.466646
	Coffee	0.202692	0.138319	0.125799	0.105686	0.306243	0.186103	2.02689	1.51952	1.8644	1.3652	2.21058	1.74626	2.84519	2.76519	3.01646	2.8878	2.72278	2.66156
	Coffee mixes	0.00859785	0.000183181	0.0005717	0	0.0194067	0.000451411	0.0658625	0.00190143	0.069842	0.00180252	0.0613637	0.00204677	0.278013	0.0189968	0.448818	0.0351829	0.155942	0.00531719
	Cordials	0.587821	0.958799	0.715073	1.12645	0.416449	0.71331	0.420206	0.84303	0.635673	1.13727	0.176616	0.410684	0.174596	0.380713	0.23796	0.472167	0.129311	0.30342
	Energy drinks	0.416988	0.680152	0.652602	1.02804	0.0996859	0.170746	0.363573	0.72941	0.602523	1.07796	0.0934342	0.217262	0	0	0	0	0	0
	Instant coffee	0.133299	0.210635	0.0397383	0.0606443	0.259298	0.430264	0.602592	1.17264	0.48786	0.846779	0.732299	1.65143	0.534746	1.13003	0.428666	0.824005	0.610561	1.38866
	Soft drinks	7.4332	11.6872	8.02015	12.1953	6.64276	10.9432	7.24409	13.9783	9.16716	15.7538	5.07003	11.3695	1.68371	3.56905	2.02376	4.00062	1.44067	3.20431
	Tea	0.999008	1.54272	0.755632	1.14512	1.32676	2.12493	0.896156	1.72203	0.726885	1.23655	1.08752	2.43537	1.20964	2.49122	1.81758	3.43096	0.775153	1.69701
	Waters	0.119017	0.194129	0.168036	0.264706	0.0530025	0.0907847	0.0726813	0.145815	0.136971	0.245053	0	0	0	0	0	0	0	0
Bread and bakery products		17.9134	21.229	18.6394	20.9857	16.9356	21.5854	14.6778	20.0017	15.1699	17.6601	14.1214	23.4423	14.1622	20.2087	13.0735	15.7897	14.9403	23.9434
	Biscuits	5.41492	8.48194	6.23527	9.38704	4.31016	7.15662	4.29187	8.29996	4.91178	8.46132	3.59105	8.06286	3.00611	6.30955	3.54268	6.78804	2.62263	5.90515
	Bread	2.29665	0.409017	2.45713	0.36441	2.08054	0.474335	2.94428	0.660364	3.3467	0.412232	2.48934	1.02496	2.72271	0.517714	3.31566	0.664574	2.29894	0.393594
	Cakes, muffins, and pastry	10.2018	12.3381	9.94705	11.2342	10.5449	13.9545	7.44162	11.0414	6.91143	8.78659	8.04101	14.3545	8.43339	13.3814	6.2152	8.33707	10.0187	17.6447
	Dough	0	0	0	0	0	0	0	0	0	0	0	0	0	0	0	0	0	0
Cereals and cereal products		6.62915	6.23669	6.46838	6.04348	6.84566	6.5196	3.09703	2.82142	2.80818	2.42402	3.42359	3.40534	1.92493	0.259653	0.84247	0.236032	2.69856	0.279616
	Breakfast cereals	2.7867	2.9823	2.91724	3.2601	2.6109	2.57552	1.78649	1.81333	1.84864	1.8058	1.71623	1.8244	0.941806	0.135017	0.116837	0.0574193	1.5314	0.200599
	Cereal bars	0.614574	0.808052	0.523279	0.632329	0.737522	1.06536	0.257645	0.419562	0.133721	0.213917	0.397744	0.721727	0.0288279	0.0416074	0.0691643	0.0908383	0	0
	Noodles	0.00375351	8.66457e-05	0.00365229	9.65387e-05	0.00388982	7.21594e-05	0.0135281	6.85741e-06	0.000191918	1.15244e-05	0.0286049	0	0.0430324	1.44283e-05	0.0893436	0	0.00993439	2.66224e-05
	Pasta	0.199518	0.00829174	0.206819	0.000186427	0.189685	0.0201603	0.200409	0.00131184	0.212824	0	0.186374	0.00323939	0.10921	0.00415542	0.176982	0.00553264	0.0607744	0.00299147
	Porridge	3.02461	2.43796	2.81739	2.15077	3.30367	2.85849	0.83896	0.587203	0.612801	0.404288	1.09464	0.855969	0.802057	0.0788586	0.390143	0.082242	1.09645	0.0759992
Confectionery		6.19223	9.24309	6.06042	8.89169	6.36974	9.75765	3.34014	6.18572	4.01405	6.68708	2.57826	5.44904	1.67715	3.35914	2.06805	3.82176	1.39778	2.96815
	Chewing gum	0.0376787	0.0614581	0.0299763	0.0472214	0.0480517	0.0823047	0.0147342	0.0295601	0.0277672	0.0496779	0	0	0	0	0	0	0	0
	Chocolate and sweets	5.68666	8.41845	5.73891	8.38521	5.61629	8.46711	3.30495	6.11511	3.98628	6.6374	2.53468	5.34769	1.61138	3.21572	1.91025	3.50865	1.39778	2.96815
	Jelly	0.467897	0.76319	0.291536	0.459255	0.705401	1.20824	0.0204579	0.0410433	0	0	0.0435861	0.10135	0.0657728	0.14342	0.157803	0.313117	0	0
Convenience foods		1.77202	0.283852	1.64295	0.294541	1.94585	0.2682	3.06469	0.533379	3.10673	0.505739	3.01716	0.573991	2.99191	0.336573	3.849	0.563386	2.37937	0.144882
	Burgers	0.107	0.0107208	0.0803956	0.00760544	0.142828	0.0152826	0.174727	0.0225466	0.299712	0.0344885	0.0334289	0.00499964	0	0	0	0	0	0
	Pizza	0.233341	0.159669	0.27404	0.180078	0.178532	0.129785	0.242853	0.213088	0.275196	0.214648	0.20629	0.210794	0.0384439	0.0383764	0.0337163	0.0316155	0.0418227	0.0440903
	Ready meals	0	0	0	0	0	0	0.00131055	0.000305276	0.0024698	0.000513038	0	0	0	0	0	0	0	0
	Salad	0.583473	0.0372411	0.534036	0.0389385	0.65005	0.0347556	1.40872	0.124397	1.2923	0.0829798	1.54034	0.185252	1.6043	0.215737	2.16294	0.414722	1.20504	0.0475643
	Sandwiches	0.179875	0.0523583	0.221695	0.05109	0.123555	0.0542154	0.332233	0.148357	0.411852	0.148758	0.242222	0.147768	0.103474	0.0324847	0.159444	0.0413312	0.0634729	0.025008
	Soup	0.668336	0.0238623	0.532785	0.0168286	0.850882	0.0341617	0.904843	0.024686	0.8252	0.0243516	0.99488	0.0251775	1.2457	0.0499758	1.49291	0.075718	1.06903	0.0282198
Dairy		16.3387	10.6822	15.6964	9.24802	17.2036	12.7823	14.334	10.3261	12.6819	8.47897	16.2017	13.0402	10.2908	5.10247	8.78856	4.17257	11.3645	5.88837
	Cheese	0.0434251	0	0.0498029	0	0.0348361	0	0.123785	0	0.0988637	0	0.15196	0	0.0649166	0	0.0920804	0	0.045503	0
	Cheese spreads	0.0144946	0.019089	0.0153654	0.0195433	0.0133219	0.0184237	0.00404314	0.00654931	0	0	0.008614	0.0161725	0	0	0	0	0	0
	Concentrated milks	0.0995762	0	0.173517	0	0	0	0.00358333	0	0.00675296	0	0	0	0	0	0	0	0	0
	Cottage cheese	0.0717529	0.0169686	0.046582	0	0.105651	0.0418154	0.144053	0	0.0986162	0	0.195421	0	0.107748	0	0.0965503	0	0.11575	0
	Cream	0.0315447	0	0.0296036	0	0.0341588	0	0.128695	0.00846929	0.0450784	0	0.223226	0.0209136	0.065731	0.0183348	0.075697	0	0.0586085	0.0338305
	Desserts	0.932542	0.962804	0.881429	0.955138	1.00138	0.97403	1.36858	2.23055	1.53952	2.28314	1.17532	2.15329	0.519325	0.71504	0.451815	0.675021	0.567574	0.748862
	Flavoured yoghurt	2.8377	3.05308	2.74651	2.80552	2.96049	3.41556	2.35454	3.14064	2.42683	2.84723	2.27281	3.57176	1.02413	1.41931	0.676719	0.756668	1.27242	1.97933
	Ice cream and edible ices	2.90968	3.96069	2.37834	3.08859	3.62523	5.2377	2.00313	3.33348	1.10957	1.73582	3.01332	5.681	1.10622	1.89647	0.968901	1.56107	1.20437	2.17993
	Instant cocoa	0.307372	0.135174	0.435677	0.162665	0.134585	0.0949194	0.0437554	0.0490548	0.0153195	0.0265423	0.0759028	0.0821336	0.034148	0.00507679	0.0819285	0.0110838	0	0
	Milk	5.48071	0	5.70146	0	5.18344	0	4.14491	0	3.65172	0	4.70248	0	3.14243	0	2.89615	0	3.31844	0
	Milk drinks	1.54135	1.98763	1.35012	1.69511	1.79888	2.41595	0.529285	0.847737	0.765256	1.09233	0.262514	0.488337	0.162976	0.2843	0.103149	0.163737	0.205734	0.386194
	Milk imitates	0.0898147	0.110798	0.019019	0.023893	0.185155	0.238053	0.0901858	0.121634	0.0748814	0.0989321	0.107488	0.15499	0.0322514	0.0562314	0.0028143	0	0.0532897	0.103755
	Plain yoghurt	1.79144	0.267988	1.6227	0.214805	2.01868	0.345864	3.28385	0.587987	2.74063	0.394977	3.89797	0.871588	3.88463	0.707716	3.17885	1.00499	4.38905	0.456471
	Spreads and processed cheese	0.0842643	0	0.0668281	0	0.107746	0	0.111576	0	0.108854	0	0.114654	0	0.146323	0	0.163906	0	0.133757	0
	Yoghurt imitates	0.103003	0.168009	0.179489	0.282747	0	0	0	0	0	0	0	0	0	0	0	0	0	0
Edible oils and emulsions		0.00364335	0	0.00360809	0	0.00369083	0	0.00566301	0	0.00500841	0	0.00640305	0	0.0130238	0	0.0163238	0	0.0106654	0
	Butter	0.00339262	0	0.00340848	0	0.00337126	0	0.00441435	0	0.00336547	0	0.00560014	0	0.0113734	0	0.0141914	0	0.00935936	0
	Cooking oils	0	0	0	0	0	0	0	0	0	0	0	0	0	0	0	0	0	0
	Margarine	0.000250729	0	0.000199609	0	0.000319572	0	0.00124866	0	0.00164294	0	0.000802908	0	0.00165045	0	0.00213235	0	0.00130605	0
Eggs		0.237471	0	0.277452	0	0.183629	0	0.483739	0	0.568047	0	0.388427	0	0.326781	0	0.433811	0	0.250287	0
	Eggs	0.237471	0	0.277452	0	0.183629	0	0.483739	0	0.568047	0	0.388427	0	0.326781	0	0.433811	0	0.250287	0
Fish and fish products		0.0258619	0.00777138	0.0285289	0.00795544	0.0222704	0.00750186	0.0206291	0.0101401	0.00778719	0.00375936	0.0351472	0.0195155	0.01474	0.00269932	0.0218413	0.00248485	0.0096648	0.00288058
	Canned fish	0.0031785	0.00518447	0.00304054	0.00478974	0.00336429	0.00576248	0.00362303	0.00726862	0.000893715	0.00159893	0.00670858	0.0155994	0.000696244	0.00151818	0	0	0.00119384	0.00280127
	Canned fish with vegetable	0	0	0	0	0	0	0	0	0	0	0	0	0	0	0	0	0	0
	Fish dishes	0.0139856	0.0020405	0.0189712	0.00282952	0.00727153	0.000885145	0.0123736	0.00283012	0.00661546	0.00209101	0.0188834	0.00391613	0.0113324	0.00100735	0.015669	0.00219926	0.00823309	0
	Fish spreads	0.00136417	0.000266011	0.00187828	0.000336192	0.000671819	0.000163246	1.13017e-07	0	1.937e-08	0	2.18881e-07	0	0.000560776	0.00017379	0.00101259	0.000285582	0.000237868	7.93095e-05
	Fresh fish	0.00610196	0	0.00463881	0	0.00807239	0	0.00448482	0	0	0	0.009555	0	0.00215061	0	0.00515979	0	0	0
	Processed fish products	0.00123167	0.000280403	0	0	0.00289035	0.000690995	0.000147515	4.1307e-05	0.000277999	6.94195e-05	0	0	0	0	0	0	0	0
	Unprocessed fish	0	0	0	0	0	0	0	0	0	0	0	0	0	0	0	0	0	0
Foods for specific dietary use		0.809321	0.855095	1.30836	1.28916	0.137259	0.219492	0.400348	0.797251	0.61928	1.09948	0.152841	0.353167	0	0	0	0	0	0
	Baby foods	0.800998	0.84152	1.30836	1.28916	0.117729	0.18604	0.32951	0.655134	0.61928	1.09948	0.00191916	0.0022313	0	0	0	0	0	0
	Meal replacements	0.00832247	0.0135749	0	0	0.0195304	0.0334523	0.0708377	0.142117	0	0	0.150921	0.350936	0	0	0	0	0	0
Fruit and vegetables		29.9306	24.0524	29.0651	25.5001	31.0961	21.9325	35.6302	20.3602	32.9169	22.9369	38.6976	16.5742	47.7425	35.7589	45.0066	35.0606	49.6979	36.3491
	Canned fruit	1.02148	1.06684	1.22485	1.3021	0.747596	0.722365	1.40087	2.2354	2.0102	2.75545	0.711999	1.47126	5.59415	5.98422	1.25035	1.76893	8.69861	9.54677
	Canned vegetables	0.104817	0.00632221	0.110621	0.0106398	0.0970001	0	0.278074	0.0125276	0.309929	0.0077828	0.242062	0.0194994	0.249936	0.00161787	0.408826	0.00353217	0.13638	0
	Dried fruit	0.671241	0.0461497	0.444891	0.0410186	0.976068	0.0536631	1.01225	0	0.599139	0	1.47928	0	1.81576	0.190802	1.2307	0	2.2339	0.352059
	Dried vegetables	0.0038977	0	0.00306492	0	0.00501922	0	0.0415422	0	0.0196926	0	0.0662437	0	0.0103029	0	0.00647128	0	0.0130413	0
	Fresh fruit	11.931	0.0958209	10.1918	0.0944639	14.273	0.0978078	19.9853	0.236772	15.3399	0.250854	25.2371	0.21608	23.5712	1.5798	22.2864	0.931288	24.4894	2.12789
	Frozen fruit	0	0	0	0	0	0	0	0	0	0	0	0	0.0360649	0.0417799	0.0865274	0.0912148	0	0
	Frozen vegetables	0	0	0	0	0	0	0.0147846	0	0	0	0.0314989	0	0.00507286	0	0	0	0.00869836	0
	Fruit and vegetable juices	10.5998	17.084	11.3345	17.8505	9.61046	15.9616	6.26929	12.564	8.38665	15.0001	3.87556	8.98452	9.06628	19.6792	13.693	27.0308	5.75962	13.466
	Jam and marmalade	3.95178	5.67335	4.37448	6.15233	3.38254	4.97198	3.13942	5.24113	3.30036	4.91543	2.95747	5.71969	4.62226	8.25241	3.54206	5.23481	5.39427	10.8027
	Mushrooms	0.00748209	0	0	0	0.0175582	0	0.0382515	0	0.0518692	0	0.0228563	0	0.0382684	0	0.0374948	0	0.0388212	0
	Nuts and fruit mixes	0.393855	0	0.17751	0	0.685208	0	0.90054	0	0.73253	0	1.09048	0	0.261693	0	0.377056	0	0.179244	0
	Nuts and seeds	0.077102	0	0.0666487	0	0.0911795	0	0.260167	0	0.21662	0	0.309397	0	0.132614	0	0.0983177	0	0.157125	0
	Raw vegetables	0.69647	0.036367	0.770265	0.0304912	0.597092	0.0449708	1.46714	0.0123603	1.20546	0.00704714	1.76297	0.0201671	1.4357	7.09604e-05	1.38439	2.56019e-05	1.47238	0.000109295
	Vegetable dishes	0.471638	0.0435625	0.366408	0.0185634	0.613351	0.0801684	0.822532	0.058023	0.744502	0.00020608	0.910747	0.142976	0.903249	0.0290355	0.604974	5.68801e-05	1.11642	0.0535269
Meat and meat products		1.26429	0.427758	1.24415	0.39008	1.29142	0.48293	2.0738	0.785486	2.38186	0.764328	1.72553	0.816575	1.55569	0.713834	1.79504	0.801036	1.38463	0.640136
	Animal fat products	0.000758548	0	0.000732111	0	0.00079415	0	0.00155333	0	0.00235146	0	0.000651028	0	0.00402319	0	0.00559573	0	0.00289931	0
	Meat alternatives	0.00434565	0	0	0	0.0101979	0	0	0	0	0	0	0	0	0	0	0	0	0
	Meat dishes	0.992582	0.14232	0.951822	0.116091	1.04747	0.180726	1.7519	0.354269	1.97686	0.320636	1.49757	0.403687	1.29101	0.408383	1.39534	0.314908	1.21644	0.487383
	Processed meat	0.266604	0.285438	0.291595	0.273989	0.23295	0.302204	0.320349	0.431217	0.402642	0.443692	0.227315	0.412888	0.260659	0.305451	0.3941	0.486128	0.165291	0.152752
	Unprocessed meat	0	0	0	0	0	0	0	0	0	0	0	0	0	0	0	0	0	0
Other		1.13485	0.145966	0.989638	0.116733	1.33041	0.188771	1.41548	0.105082	1.25632	0.0265437	1.59541	0.220482	1.03825	0.29452	1.1704	0.0257999	0.943802	0.521628
	Additives	0	0	0	0	0	0	0.0582948	0	0	0	0.124198	0	0.00338932	0	0	0	0.00581161	0
	Food supplements	0	0	0	0	0	0	0	0	0	0	0	0	0	0	0	0	0	0
	Other	0.204567	0.110108	0.149353	0.0760792	0.278922	0.159937	0.00312556	0.00202767	0.00589026	0.00340765	0	0	0.0308704	0.0217668	0	0	0.052933	0.0401631
	Potato	0.650194	0	0.543837	0	0.793426	0	0.631255	0	0.671219	0	0.586074	0	0.641101	0	0.804895	0	0.524039	0
	Salt	0	0	0	0	0	0	0	0	0	0	0	0	0	0	0	0	0	0
	Side dishes	0.267145	0.0198954	0.282863	0.0259489	0.245977	0.0110313	0.680319	0.0288238	0.565747	0.00812695	0.809845	0.0592348	0.341505	0.245046	0.341655	0	0.341398	0.452147
	Spices	0.00355271	0.000640922	0.00493476	0.00107862	0.0016915	0	0.00650633	0.00206082	0.00614497	0.00192108	0.00691485	0.00226616	0.00878948	0.000242871	0.0108498	0	0.00731698	0.000448134
	Vinegar	0.00939294	0.0153209	0.00864974	0.0136259	0.0103938	0.0178029	0.0359783	0.0721697	0.00731548	0.013088	0.0683823	0.158981	0.012595	0.0274639	0.0130025	0.0257999	0.0123038	0.0288702
Sauces and spreads		3.66389	4.99263	3.48308	4.45697	3.90738	5.77699	1.67809	2.46693	2.36925	3.19366	0.896717	1.39911	0.519889	0.412959	0.69472	0.456075	0.394939	0.376519
	Mayonnaise/dressings	0.00577724	0.00672144	0.00975653	0.0108224	0.000418314	0.000716504	0.0145057	0.00979488	0.0192128	0.00192672	0.00918422	0.021356	5.27307e-05	0.000114981	0.000126512	0.000251029	0	0
	Nut spreads	0.0129862	0	0.0226292	0	0	0	0.0222946	0	0.022269	0	0.0223236	0	0	0	0	0	0	0
	Other sauces	0.279635	0.261274	0.319374	0.298305	0.226119	0.207048	0.261975	0.282637	0.329913	0.364526	0.18517	0.162314	0.16029	0.0338846	0.319685	0.0489686	0.0463728	0.0211365
	Other spreads	0.00214135	0.000693996	0.00214745	0	0.00213313	0.00171021	0.00142566	0.00189406	0.00113927	0.00133573	0.00174943	0.00271445	0.000817246	0.000808305	2.78816e-05	0	0.00138139	0.00149144
	Pasta sauces	0.0923719	0.0962224	0.104669	0.120372	0.0758121	0.0608603	0.0973016	0.133638	0.114222	0.175004	0.0781725	0.0728553	0.0677039	0.0538222	0.121218	0.0997572	0.0294584	0.0150003
	Sauces	0.229921	0.185379	0.340558	0.291704	0.0809253	0.0296887	0.347098	0.351175	0.604446	0.567364	0.0561611	0.0335188	0.209568	0.199289	0.0666438	0.0368193	0.311713	0.3366
	Sweet spreads	3.03892	4.44234	2.68129	3.73577	3.52054	5.47697	0.926344	1.68659	1.27194	2.08263	0.535645	1.10466	0.0764329	0.123798	0.183379	0.270279	0	0
	Vegetable spreads	0.00213613	0	0.00265882	0	0.00143222	0	0.00714582	0.00120234	0.00611492	0.000871144	0.00831128	0.00168897	0.00502425	0.00124149	0.00364012	0	0.00601347	0.00229073
Snackfoods		0.153623	0.108481	0.173016	0.118437	0.127506	0.0939044	0.123812	0.14454	0.147732	0.161139	0.0967702	0.12015	0.026697	0.0217229	0.0163574	0.011386	0.0340866	0.0304592
	Crisps and snacks	0.153623	0.108481	0.173016	0.118437	0.127506	0.0939044	0.123812	0.14454	0.147732	0.161139	0.0967702	0.12015	0.026697	0.0217229	0.0163574	0.011386	0.0340866	0.0304592
Sugars, honey and related products		3.73657	6.09475	4.07163	6.414	3.28534	5.62726	6.95526	13.9538	7.05786	12.6271	6.83927	15.9033	9.98547	21.7736	12.5632	24.9282	8.14321	19.1076
	Honey	1.13102	1.84482	1.22636	1.93187	1.00263	1.71735	2.96277	5.94399	1.88451	3.37154	4.18177	9.72382	5.85	12.7561	6.55185	13.0003	5.3484	12.5497
	Sugar	1.09736	1.78991	0.880348	1.38681	1.38961	2.38018	3.02036	6.05954	3.52168	6.30058	2.45361	5.70536	2.8553	6.22608	3.68924	7.32028	2.2593	5.30131
	Syrup	1.50818	2.46001	1.96492	3.09532	0.893098	1.52973	0.972131	1.95032	1.65168	2.955	0.203885	0.474092	1.28017	2.79144	2.3221	4.60758	0.535509	1.25654
Unprocessed cereals		0.126113	0.0124979	0.13799	0.00380309	0.110118	0.0252295	0.131623	0	0.118802	0	0.146119	0	0.182112	0.021622	0.127219	0.0231662	0.221343	0.020317
	Rice	0.0138095	0	0.011279	0	0.0172173	0	0.0147024	0	0.0120217	0	0.017733	0	0.010764	0	0.0109284	0	0.0106465	0
	Unprocessed cereals	0.112304	0.0124979	0.126711	0.00380309	0.0929012	0.0252295	0.116921	0	0.10678	0	0.128386	0	0.171348	0.021622	0.116291	0.0231662	0.210697	0.020317

## Sheet: Supplementary Table 3
Table S3: Habitual intakes of total, free, and CHO TEI: total energy intake and percent of total CHO per age categories and different individual and sociodemographic groups
		Total sugars							Free sugars									CHO
Variables	N (%)	Mean (g)	SE	CI Low	CI High	Median (g)	% TEI (mean)	% Total CHO (mean)	Mean (g)	SE	CI Low	CI High	Median (g)	% TEI (mean)	<5% TEI Prevalence N (%)	<10% TEI Prevalence N (%)	% Total CHO (mean)	Mean (g)	SE	CI Low	CI High	Median (g)
10-17 y	468(37.5)	74.4	0.82	72.8	76	74.307	18.6	35.1	41.2	0.78	39.7	42.7	39.8831	10.3	61 (13.0)	262 (56.0)	19.4	211.4	0.87	209.7	213.1	212.261
Gender
Male	238 (50.9)	71.7	1.14	69.4	73.9	73.0332	16.3	33.9	39.2	1.06	37.1	41.3	38.2387	8.9	43 (18.1)	164 (68.9)	18.5	210.4	1.24	208	212.8	211.791
Female	230 (49.1)	77.3	1.14	75.1	79.6	77.5367	21.1	36.3	43.3	1.11	41.1	45.5	42.8079	11.8	18 (7.8)	98 (42.6)	20.2	212.5	1.21	210.1	214.9	212.694
Place of living
Vilage	270 (57.7)	74.6	1.09	72.4	76.7	75.345	18.4	35.2	42.4	1	40.4	44.3	42.0088	10.5	31 (11.5)	144 (53.3)	19.9	211	1.13	208.8	213.3	212.434
Town	76 (16.2)	76.4	1.93	72.6	80.2	75.915	18.6	36.3	42.3	2.04	38.3	46.3	40.7046	10.2	10 (13.2)	42 (55.3)	20	210.6	2.08	206.5	214.7	209.404
City	122 (26.1)	72.9	1.59	69.8	76	71.6368	19.2	34	38.1	1.47	35.2	41	35.5172	10	20 (16.4)	76 (62.3)	17.7	212.9	1.74	209.4	216.3	213.674
BMI
Normal	301 (64.3)	76.156	1.00511	74.178	78.134	76.1665	18.7739	35.8616	42.5871	0.965278	40.6875	44.4867	41.878	10.4757	34 (11.3)	165 (54.8)	20.0089	211.655	1.02813	209.631	213.678	211.982
Overweight and obese	167 (35.7	71.3702	1.36861	68.6681	74.0723	70.7613	18.352	33.6247	38.7662	1.2831	36.2329	41.2995	37.5713	10.0122	27 (16.2)	97 (58.1)	18.1918	211.041	1.57345	207.935	214.148	212.597
IPAQ levels
Low	108 (23.3)	75.1	1.6	72	78.3	73.4954	17.8	35.2	42.3	1.6	39.12	45.4	40.6779	10	13 (12.0)	59 (54.63)	19.8	213.5	1.9	209.8	217.2	212.227
Moderate	141 (30.5)	74	1.49	71.1	76.9	75.8883	19.4	34.7	41.3	1.34	38.7	43.9	40.9565	10.9	17 (12.1)	78 (55.3)	19.3	211.7	1.56	208.6	214.8	212.676
High	214 (46.2)	74.5	1.24	72	76.9	74.3059	18.4	35.2	40.7	1.19	38.4	43.1	39.3045	10.1	30 (14.0)	124 (57.9)	19.2	210.2	1.26	207.8	212.7	211.791
18-64 y	364 (29.2)	60.2	1.1	58.1	62.3	59.4891	14.9	31.3	27	0.91	25.2	28.8	23.3374	6.6	160 (44.0)	299 (82.1)	13.9	191	1.4	188.3	193.7	191.212
Gender
Male	173 (47.5)	56.4	1.69	53	59.7	55.2523	12.1	29.5	27	1.49	24.1	29.9	19.9703	5.8	91 (52.6)	153 (88.4)	14	188.2	2.2	183.9	192.6	185.36
Female	191 (52.5)	63.7	1.29	61.1	66.2	62.7805	17.4	32.9	26.9	1.1	24.8	29.1	24.5889	7.4	69 (36.1)	146 (76.4)	13.8	193.5	1.7	190.1	196.8	195.236
Place of living
Vilage	202 (55.5)	61.6	1.53	58.6	64.7	60.4158	14.6	31.5	28.3	1.29	25.7	30.8	24.9209	6.6	84 (41.6)	166 (82.2)	14.3	193.9	1.88	190.2	197.6	194.528
Town	56 (15.4)	56.1	2.22	51.8	60.5	56.4158	14.8	30.1	23.8	1.8	20.3	27.4	21.0478	6.4	27 (48.2)	46 (82.1)	12.9	186.4	3.6	179.3	193.4	188.64
City	106 (29.1)	59.6	1.85	55.9	63.2	60.1456	15.4	31.4	26.2	1.68	22.9	29.5	21.6659	6.8	49 (46.2)	87 (82.1)	13.8	187.8	2.38	183.1	192.5	187.612
BMI
Normal	148 (40.7)	63.2	1.6	60.1	66.4	61.8227	15.6	32.2	28.4	1.47	25.5	31.3	24.7205	7.1	59 (39.9)	120 (81.1)	14.4	195.8	2.18	191.5	200	195.021
Overweight and obese	216 (59.3)	58.1	1.41	55.3	60.9	57.1151	14.4	30.6	26	1.16	23.7	28.3	21.4331	6.4	101 (46.8)	179 (82.3)	13.6	187.7	1.75	184.3	191.1	188.363
IPAQ levels
Low	127 (35.3)	61.2	1.95	57.4	65	59.7353	14.8	31.7	27	1.62	23.8	30.2	20.8769	6.3	64 (50.4)	103 (81.1)	13.9	190.9	2.38	186.2	195.6	193.44
Moderate	108 (30.0)	59.6	1.76	56.2	63.1	59.3441	15	31.3	25.9	1.41	23.1	28.7	24.5995	6.6	42 (38.9)	94 (87.0)	13.6	190	2.28	185.6	194.5	190.51
High	125 (34.7)	60.2	1.84	56.6	63.8	60.1985	15	30.9	28	1.67	24.7	31.3	23.9279	6.9	52 (41.6)	99 (79.2)	14.3	193	2.44	188.2	197.8	191.478
Education
No university degree	249 (68.4)	59.9	1.36	57.2	62.6	57.8692	15	31.1	27.4	1.15	25.2	29.7	23.2009	6.8	107 (43.0)	202 (81.1)	14.1	190.2	1.7	186.8	193.5	191.054
University degree	115 (31.6)	60.8	1.66	57.5	64	60.5582	14.6	31.6	26	1.47	23.2	28.9	23.5247	6.2	53 (46.1)	97 (87.4)	13.5	192.7	2.35	188.1	197.3	191.34
Family net income
≤1300	118 (38.4)	59.2	1.8	55.7	62.8	59.628	15.2	30.6	23.6	1.41	20.8	26.4	21.0778	5.9	57 (48.3)	103 (87.3)	12.2	192.5	2.38	187.8	197.2	193.886
>1300	189 (61.6)	60.3	1.53	57.2	63.3	59.3288	14.8	31.5	27.9	1.33	25.3	30.5	21.8392	6.9	84 (44.4)	150 (79.4)	14.4	189.7	1.94	185.9	193.5	189.144
Employment
Employed	226 (62.1)	59.7	1.39	57	62.5	59.4798	14.5	31.2	27.7	1.22	25.3	30.1	24.1287	6.7	98 (43.4)	184 (81.4)	14.3	190.1	1.77	186.6	193.5	189.116
Unemployed	42 (11.5)	61	3	55.1	66.9	61.15	15.8	31.3	25.8	2.4	21.1	30.5	21.6868	6.8	19 (45.2)	33 (78.6)	13.4	194.4	3.93	186.7	202.1	196.393
Student	32 (8.8)	65.1	3.51	58.2	72	63.362	15.5	33.6	32.5	3	26.6	38.4	32.2899	7.4	7 (21.9)	26 (81.3)	16.8	192.2	4.56	183.2	201.2	195.546
Retired	64 (17.6)	58.8	2.45	54	63.7	58.462	15.5	30.5	22.2	1.74	18.8	25.6	18.657	5.9	36 (56.3)	56 (87.5)	11.5	191.3	3.38	184.6	197.9	194.759
65-74 y	416 (33.3)	61	1.2	58.7	63.3	59.7224	15.7	31.7	24	0.81	22.4	25.6	19.4718	6.2	196 (47.1)	356 (85.6)	12.4	188.6	1.5	185.7	191.6	189.898
Gender
Male	213 (51.2)	54.7	1.63	51.4	57.9	52.2974	12.9	29.4	22.4	1.17	20.1	24.7	18.1516	5.3	125 (58.7)	189 (88.7)	11.9	182	2.19	177.7	196.3	181.226
Female	203 (48.8)	67.7	1.56	64.7	70.9	65.8601	18.6	34.2	25.7	1.11	23.5	27.9	22.552	7	71 (35.0)	167 (82.3)	13	195.6	1.89	191.9	199.3	196.74
Place of living
Vilage	229 (55.1)	59.7	1.59	56.6	62.8	59.0807	14.6	31.1	24.6	1.13	22.4	26.8	19.8662	6.6	111 (48.5)	196 (85.6)	12.7	187.9	2.04	183.9	191.9	189.707
Town	71 (17.1)	63.3	3.02	57.4	69.3	60.21	17.2	33.1	24.2	2.07	20.1	28.2	18.9895	6.4	31 (43.7)	60 (84.5)	12.6	188.6	3.56	181.6	195.6	189.167
City	116 (27.9)	62.3	2.11	58.1	66.4	60.2503	17	32.3	22.8	1.38	20.1	25.5	19.08	6.8	54 (46.6)	100 (86.2)	11.8	190.2	2.78	184.7	195.6	191.004
BMI
Normal	108 (26.0)	60.4	2.02	56.4	64.4	59.9682	15.6	31.7	22.8	1.28	20.3	25.3	19.3984	7.1	53 (49.1)	92 (85.2)	12	188.9	2.5	184	193.8	189.496
Overweight and obese	308 (74.0)	61.3	1.41	58.5	64	59.5632	15.7	31.8	24.5	1	22.5	26.4	19.5384	6.3	143 (46.4)	264 (85.7)	12.6	188.5	1.81	185	192.1	189.898
IPAQ levels
Low	137 (33.4)	60.7	2.11	56.5	64.8	57.023	15.4	31.7	25	1.53	22	28	19.0958	6.3	65 (47.5)	117 (85.4)	13	187	2.58	181.9	192	187.283
Moderate	133 (32.4)	59.6	1.98	55.7	63.5	57.8733	15.8	31.2	23.3	1.28	20.8	25.8	20.3561	6.1	59 (44.4)	112 (84.2)	12.2	188.3	2.54	183.4	193.3	191.202
High	140 (34.2)	62.7	2.07	58.7	66.8	60.8855	15.9	32.4	23.9	1.43	21.1	26.7	19.3899	6.1	69 (49.3)	121 (86.4)	12.1	190.2	2.69	184.9	195.5	191.784
Education
No university degree	342 (82.2)	61.2	1.28	58.6	63.7	60.1612	15.7	31.7	24.6	0.91	22.8	26.4	19.9818	6.3	156 (45.6)	292 (85.4)	12.7	189.5	1.62	186.3	192.6	190.77
University degree	74 (17.8)	60.5	2.9	54.8	66.2	55.4978	15.5	32.1	21.3	1.61	18.1	24.5	18.2678	5.4	40 (54.1)	64 (86.5)	11.3	184.9	3.78	177.4	192.3	182.833
Family net income
≤1300	269 (71.5)	61.5	1.46	58.6	64.4	60.7518	16	31.8	24.2	0.97	22.3	26.1	19.8662	6.3	115 (42.8)	230 (85.5)	12.5	189.9	1.88	186.2	193.6	191.62
>1300	107 (28.5)	60.8	2.36	56.2	65.5	57.4472	15.1	32..1	22.6	1.63	19.4	25.8	18.5544	5.6	63 (58.9)	94 (87.9)	11.8	186.2	2.85	180.6	191.8	183.408
